# Supplementary material
Source: PubMed Central journal article supplement (PMC5523000)
Supplement: BPH-174-2739-s001.pdf [file BPH-174-2739-s001.pdf]

## Supporting information

**Table S1.** Physiological parameters in human.<sup>1</sup>

| Parameters                              | Symbol | Human |
|-----------------------------------------|--------|-------|
| Body weight (kg)                        | BW     | 70    |
| Tissue volumes (% body weight)          |        |       |
| Lumen                                   | VLu    | 1.4   |
| Small intestine                         | VI     | 0.9   |
| Liver                                   | VL     | 2.6   |
| Kidney                                  | VK     | 0.4   |
| Rapidly perfused tissues                | VR     | 4.0   |
| Slowly perfused tissues                 | VS     | 75.7  |
| Blood                                   | VB     | 7.9   |
| Cardiac output (l/h)                    | QC     | 310.4 |
| Blood flow to tissue (% cardiac output) |        |       |
| Small intestine                         | QI     | 18.1  |
| Liver (exclude portal vein)             | QL     | 4.6   |
| Kidney                                  | QK     | 17.5  |
| Rapidly perfused tissues                | QR     | 29.8  |
| Slowly perfused tissues                 | QS     | 30    |

<sup>1</sup>Physiological parameters were obtained from Brown *et al.* (Brown *et al.*, 1997).

## Human small intestine S9

### A. Glucuronidation of G-7G

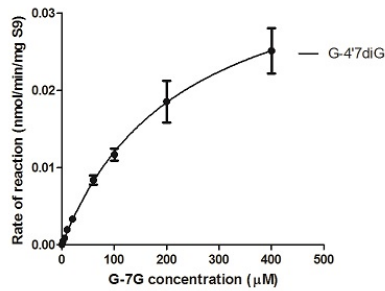

### B. Glucuronidation of G-4'G

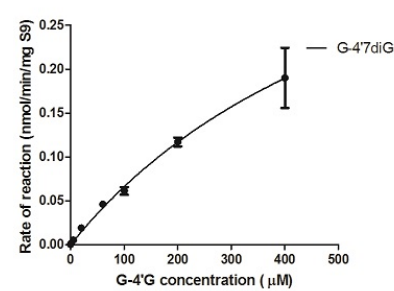

### C. Glucuronidation of G-7S

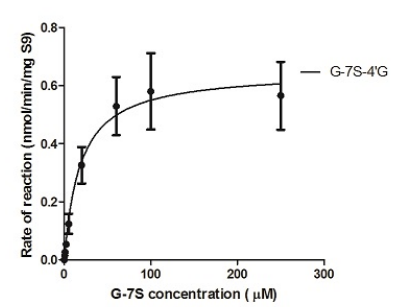

### D. Sulfation of genistein

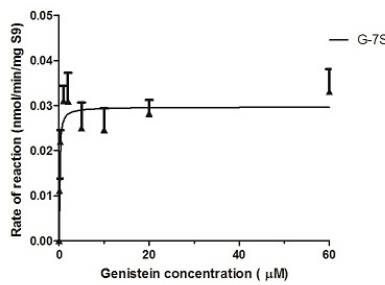

### E. Sulfation of G-7G

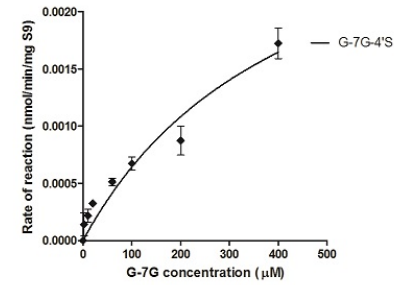

## Human liver S9

### F. Glucuronidation of G-4'G

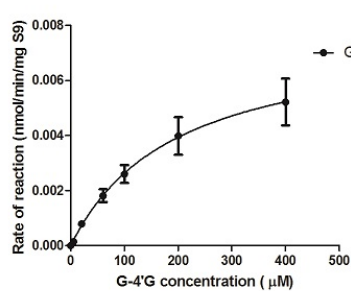

### G. Sulfation of genistein

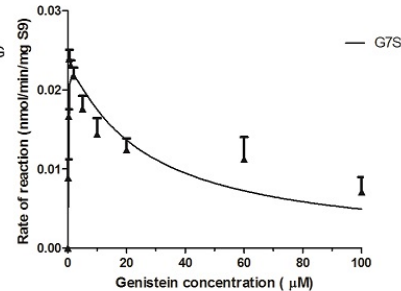

### H. Sulfation of G-7G

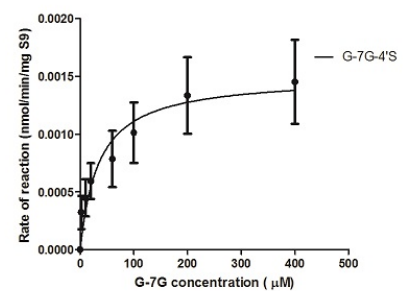

### I. Sulfation of G-4'G

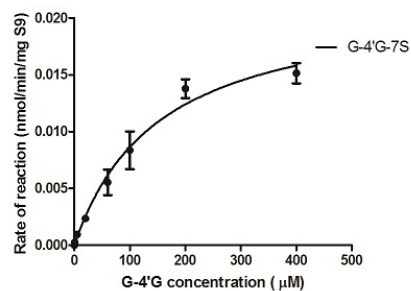

**Figure S1.** Concentration-dependent formation of genistein mono-conjugates and genistein di-conjugates with pooled mixed-gender human small intestine S9 (A – E) or liver S9 (F – I): genistein-7-O-glucuronide (G-7G), genistein-4'-O-glucuronide (G-4'G), genistein-7-O-sulfate (G-7S), genistein-4',7-O-diglucuronide (G-4'7diG), genistein-7-O-glucuronide-4'-O-sulfate (G-7G-4'S), and genistein-4'-O-glucuronide-7-O-sulfate (G-4'G-7S).

### A. Genistein as oral form

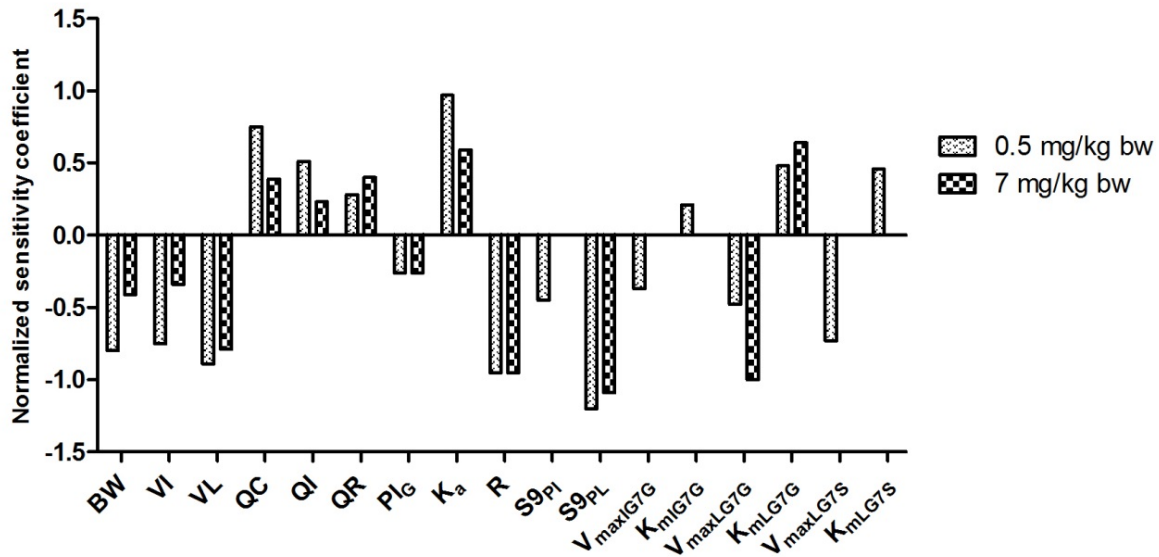

### B. Genistin as oral form

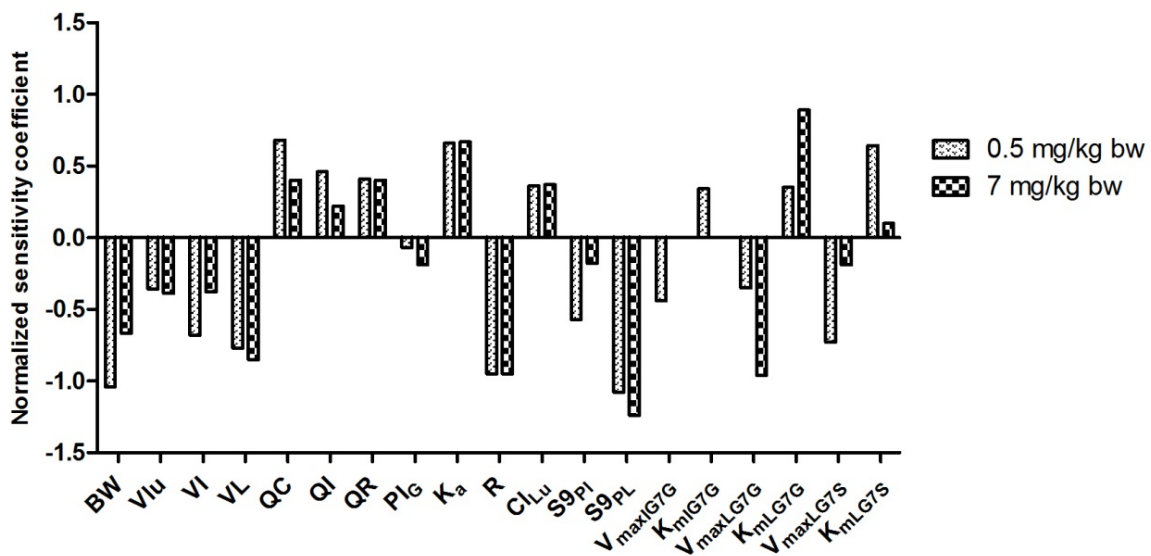

**Figure S2.** Sensitivity analysis of the predicted plasma  $C_{max}$  of genistein aglycone at an oral dose of 0.5 and 7 mg (kg bw)<sup>-1</sup> (A) genistein and (B) genistin. The parameters stand for: BW = body weight, VTi = tissue volumn (Ti = I (small intestine), L (liver), BR (breast), R (rapidly perfused tissues), and S (slowly perfused tissues), QC = cardiac output, QT<sub>i</sub>= reginal blood flow through tissue, PT<sub>IG</sub> = partition coefficient of genistein in tissue,  $K_a$  = uptake rate constant of genistein, R = blood to plasma ratio, S9<sub>PI</sub> = small intestinal S9 protein content, S9<sub>PL</sub> = liver S9 protein content,  $V_{max}$  and  $K_m$  = the maximum rate of formation and the Michaelis-Menten constant for formation of genistein-7-O-glucuronide (G7G) and genistein-7-O-sulfate (G7S).

### A. ER $\alpha$ binding

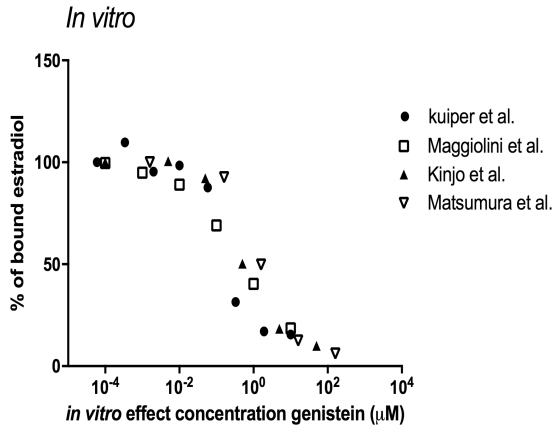

translation

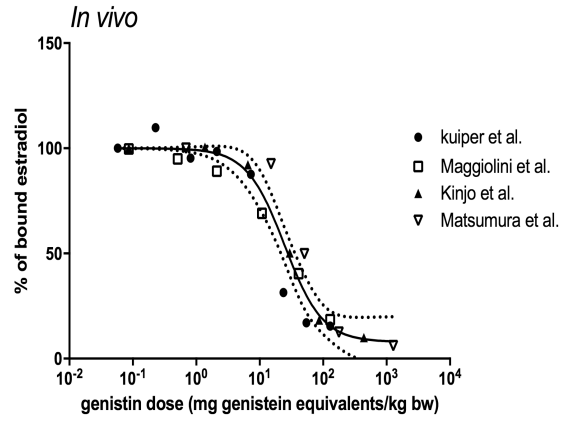

### B. ER $\beta$ binding

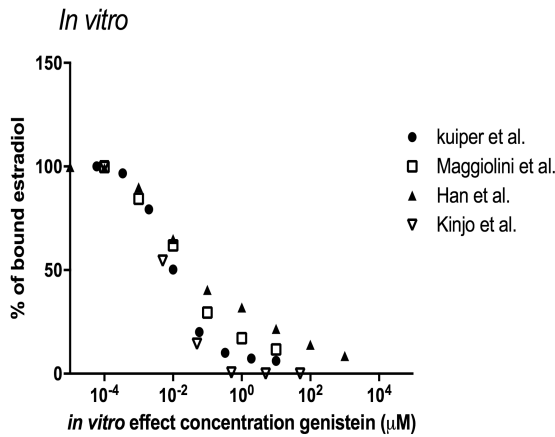

translation

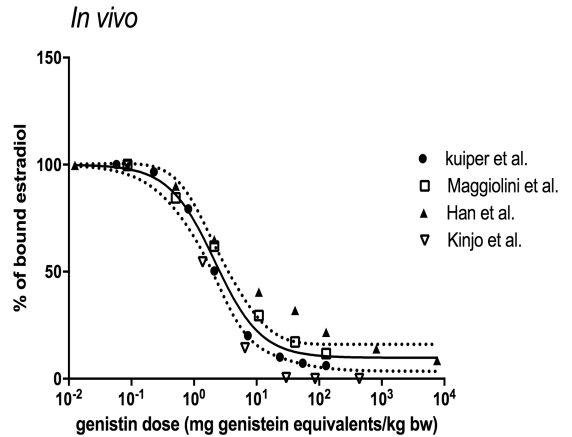

### C. ER $\alpha$ transcriptive induction

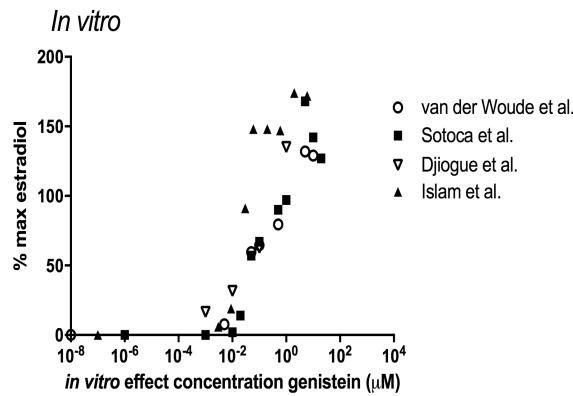

translation

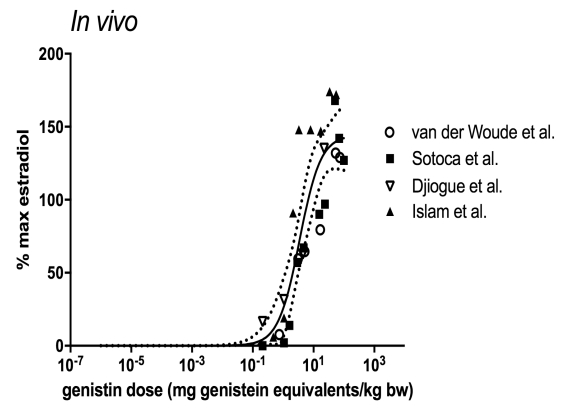

### D. ER $\beta$ transcriptive induction

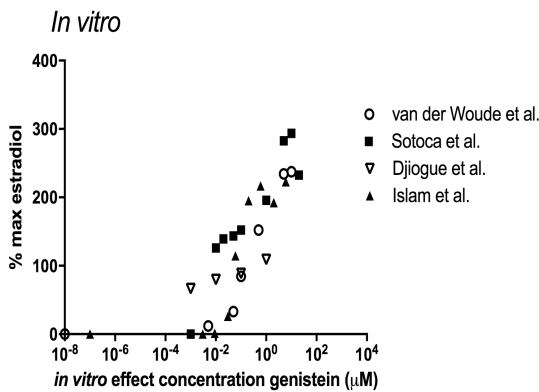

translation

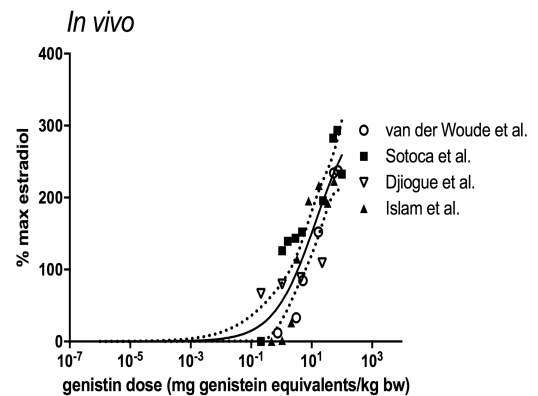

### E. ER $\alpha$ dependent proliferation

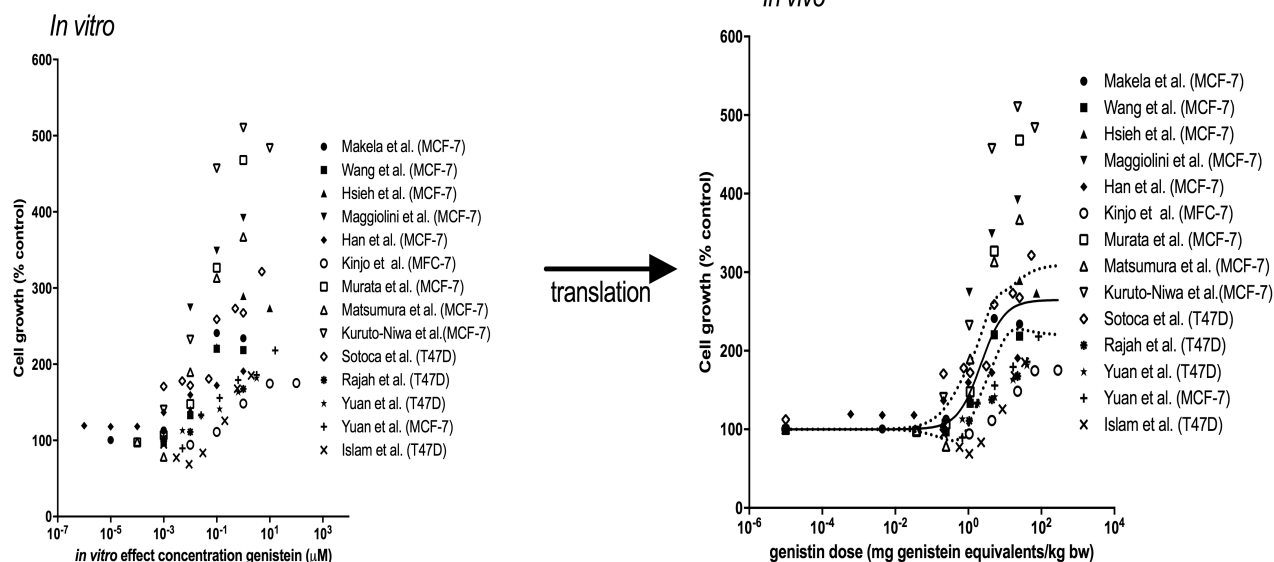

**Figure S3.** Translation of *in vitro* estrogenic concentration-response curves for genistein dependent (A) binding to ER $\alpha$  (Kuiper *et al.*, 1998; Maggiolini *et al.*, 2001; Kinjo *et al.*, 2004; Matsumura *et al.*, 2005), (B) binding to ER $\beta$  (Kuiper *et al.*, 1998; Maggiolini *et al.*, 2001; Han *et al.*, 2002; Kinjo *et al.*, 2004), (C) ER $\alpha$  mediated gene expression in U2OS reporter gene assays (van der Woude *et al.*, 2005; Sotoca *et al.*, 2008; Djiogue *et al.*, 2010; Islam *et al.*, 2015), (D) ER $\beta$  mediated gene expression in U2OS reporter gene assays (van der Woude *et al.*, 2005; Sotoca *et al.*, 2008; Djiogue *et al.*, 2010; Islam *et al.*, 2015), and (E) ER $\alpha$  dependent proliferation of MCF-7 and T47D breast cancer cells (Makela *et al.*, 1994; Wang *et al.*, 1996; Hsieh *et al.*, 1998; Maggiolini *et al.*, 2001; Han *et al.*, 2002; Kinjo *et al.*, 2004; Murata *et al.*, 2004; Matsumura *et al.*, 2005; Kuruto-Niwa *et al.*, 2007; Sotoca *et al.*, 2008; Rajah *et al.*, 2009; Yuan *et al.*, 2012; Islam *et al.*, 2015), to *in vivo* human genistein dose-response curves using PBK model based reverse dosimetry based on plasma  $C_{\text{max}}$  values of genistein aglycone. The solid lines represent the central *in vivo* dose-response curve, whereas the dashed lines represent the 95% lower and upper confidence limits.

## References

- Brown RP, Delp MD, Lindstedt SL, Rhomberg LR, Beliles RP (1997). Physiological parameter values for physiologically based pharmacokinetic models. *Toxicol Ind Health* 13: 407-484.
- Djiogue S, Njamen D, Halabalaki M, Kretzschmar G, Beyer A, Mbanya J-C, *et al.* (2010). Estrogenic properties of naturally occurring prenylated isoflavones in U2OS human osteosarcoma cells: Structure–activity relationships. *The Journal of Steroid Biochemistry and Molecular Biology* 120: 184-191.
- Han D-H, Denison MS, Tachibana H, Yamada K (2002). Relationship between estrogen receptor-binding and estrogenic activities of environmental estrogens and suppression by flavonoids. *Biosci Biotechnol Biochem* 66: 1479-1487.
- Hsieh C-Y, Santell RC, Haslam SZ, Helferich WG (1998). Estrogenic effects of genistein on the growth of estrogen receptor-positive human breast cancer (MCF-7) cells *in vitro* and *in vivo*. *Cancer Res* 58: 3833-3838.
- Islam MA, Bekele R, vanden Berg JHJ, Kuswanti Y, Thapa O, Soltani S, *et al.* (2015). Deconjugation of soy isoflavone glucuronides needed for estrogenic activity. *Toxicol In Vitro* 29: 706-715.
- Kinjo J, Tsuchihashi R, Morito K, Hirose T, Aomori T, Nagao T, *et al.* (2004). Interactions of phytoestrogens with estrogen receptors  $\alpha$  and  $\beta$  (III). Estrogenic activities of soy isoflavone aglycones and their metabolites isolated from human urine. *Biol Pharm Bull* 27: 185-188.
- Kuiper GG, Lemmen JG, Carlsson B, Corton JC, Safe SH, van der Saag PT, *et al.* (1998). Interaction of estrogenic chemicals and phytoestrogens with estrogen receptor beta. *Endocrinology* 139: 4252-4263.
- Kuruto-Niwa R, Ito T, Goto H, Nakamura H, Nozawa R, Terao Y (2007). Estrogenic activity of the chlorinated derivatives of estrogens and flavonoids using a GFP expression system. *Environ Toxicol Pharmacol* 23: 121-128.
- Maggiolini M, Bonofiglio D, Marsico S, Panno ML, Cenni B, Picard D, *et al.* (2001). Estrogen receptor  $\alpha$  mediates the proliferative but not the cytotoxic dose-dependent effects of two major phytoestrogens on human breast cancer cells. *Mol Pharmacol* 60: 595-602.
- Makela S, Davis VL, Tally WC, Korkman J, Salo L, Vihko R, *et al.* (1994). Dietary estrogens act through estrogen receptor-mediated processes and show no antiestrogenicity in cultured breast cancer cells. *Environ Health Perspect* 102: 572-578.
- Matsumura A, Ghosh A, Pope GS, Darbre PD (2005). Comparative study of oestrogenic properties of eight phytoestrogens in MCF7 human breast cancer cells. *The Journal of Steroid Biochemistry and Molecular Biology* 94: 431-443.
- Murata M, Midorikawa K, Koh M, Umezawa K, Kawanishi S (2004). Genistein and daidzein induce cell proliferation and their metabolites cause oxidative DNA damage in relation to isoflavone-induced cancer of estrogen-sensitive organs. *Biochemistry* 43: 2569-2577.
- Rajah TT, Du N, Drews N, Cohn R (2009). Genistein in the presence of 17 $\beta$ -estradiol inhibits proliferation of ER $\beta$  breast cancer cells. *Pharmacology* 84: 68-73.

Sotoca AM, Ratman D, van der Saag P, Ström A, Gustafsson JA, Vervoort J, *et al.* (2008). Phytoestrogen-mediated inhibition of proliferation of the human T47D breast cancer cells depends on the ER $\alpha$ /ER $\beta$  ratio. *The Journal of Steroid Biochemistry and Molecular Biology* 112: 171-178.

van der Woude H, ter Veld MGR, Jacobs N, van der Saag PT, Murk AJ, Rietjens IMCM (2005). The stimulation of cell proliferation by quercetin is mediated by the estrogen receptor. *Mol Nutr Food Res* 49: 763-771.

Wang TTY, Sathyamoorthy N, Phang JM (1996). Molecular effects of genistein on estrogen receptor mediated pathways. *Carcinogenesis* 17: 271-275.

Yuan B, Wang L, Jin Y, Zhen H, Xu P, Xu Y, *et al.* (2012). Role of metabolism in the effects of genistein and its phase II conjugates on the growth of human breast cell lines. *The AAPS Journal* 14: 329-344.
